# Supplementary material
Source: PubMed Central journal article supplement (PMC3954650)
Supplement: ic4024713_si_001.pdf [file ic4024713_si_001.pdf]

**Supporting Information for:**

Electrochemistry, Chemical Reactivity, and Time-resolved IR Spectroscopy of Donor-Acceptor Systems  $[(Q^x)Pt(pap^y)]$  (Q = substituted *o*-Quinone or *o*-Iminoquinone, pap = Phenylazopyridine)

*Naina Deibel,<sup>‡</sup> David Schweinfurth,<sup>†</sup> Stephan Hohloch,<sup>†</sup> Milan Delor,<sup>||</sup> Igor V. Sazanovich,<sup>||</sup>*

*Michael Towrie,<sup>£</sup> Julia A. Weinstein,<sup>\*</sup> || and Biprajit Sarkar<sup>\*,†</sup>*

**Table S1.** Crystallographic data for [1]BF<sub>4</sub> and [2]PF<sub>6</sub>.

|                                                                          | [1]BF <sub>4</sub>                                                 | [2]PF <sub>6</sub>                                                                 |
|--------------------------------------------------------------------------|--------------------------------------------------------------------|------------------------------------------------------------------------------------|
| Chemical formula                                                         | C <sub>31</sub> H <sub>34</sub> BF <sub>4</sub> N <sub>4</sub> OPt | C <sub>57</sub> H <sub>55</sub> Cl <sub>2</sub> F <sub>6</sub> NOP <sub>3</sub> Pt |
| <i>M<sub>r</sub></i>                                                     | 760.52                                                             | 1242.92                                                                            |
| Crystal system                                                           | monoclinic                                                         | triclinic                                                                          |
| Space group                                                              | Cc                                                                 | <i>P</i> -1                                                                        |
| <i>a</i> (Å)                                                             | 42.720(9)                                                          | 13.037(2)                                                                          |
| <i>b</i> (Å)                                                             | 5.940(1)                                                           | 14.066(2)                                                                          |
| <i>c</i> (Å)                                                             | 24.200(5)                                                          | 15.397(3)                                                                          |
| $\alpha$ (°)                                                             | 90                                                                 | 78.583(7)                                                                          |
| $\beta$ (°)                                                              | 114.00(3)                                                          | 82.987(9)                                                                          |
| $\gamma$ (°)                                                             | 90                                                                 | 70.899(7)                                                                          |
| <i>V</i> (Å <sup>3</sup> )                                               | 5610.0(2)                                                          | 2610.1(7)                                                                          |
| <i>Z</i>                                                                 | 8                                                                  | 2                                                                                  |
| <i>D</i> <sub>calc</sub> (g/cm <sup>3</sup> )                            | 1.801                                                              | 1.581                                                                              |
| Temperature (K)                                                          | 100(2)                                                             | 100(2)                                                                             |
| $\mu$ (mm <sup>-1</sup> )                                                | 5.063                                                              | 2.945                                                                              |
| Crystal size (mm)                                                        | 0.40 x 0.10 x 0.05                                                 | 0.35 x 0.23 x 0.19                                                                 |
| MoK $\alpha$                                                             | 0.71073                                                            | 0.71073                                                                            |
| F(000)                                                                   | 3000                                                               | 1246                                                                               |
| meas./ indep. refl.                                                      | 22637/ 8236                                                        | 164155 / 15978                                                                     |
| obsvd. [ <i>I</i> > 2 $\sigma$ ( <i>I</i> )]                             | 7698                                                               | 14942                                                                              |
| refl.                                                                    |                                                                    |                                                                                    |
| <i>R</i> <sub>int</sub>                                                  | 0.0324                                                             | 0.0295                                                                             |
| <i>R</i> [ <i>F</i> <sup>2</sup> > 2 $\sigma$ ( <i>F</i> <sup>2</sup> )] | 0.0283                                                             | 0.0183                                                                             |
| w <i>R</i> ( <i>F</i> <sup>2</sup> )                                     | 0.0780                                                             | 0.0451                                                                             |
| <i>S</i>                                                                 | 1.173                                                              | 1.070                                                                              |
| $\Delta\rho_{\max}$ , $\Delta\rho_{\min}$ (e Å <sup>-3</sup> )           | 2.544, -0.918                                                      | 1.409, -0.800                                                                      |

**Table S2.** Selected bond lengths (Å) and bond angles (°)

|                          | <b>1<sup>a</sup></b> | <b>[1]BF<sub>4</sub></b> | <b>[2]PF<sub>6</sub></b> | <b>3<sup>b</sup></b> |
|--------------------------|----------------------|--------------------------|--------------------------|----------------------|
| <b>Pt - O1/Pt - O2</b>   | 1.964(3)             | 1.976(5)                 | 2.051(1)                 | 1.994(4)/1.966(5)    |
| <b>Pt - N1</b>           | 1.978(3)             | 1.890(9)                 | 2.088(1)                 | -                    |
| <b>O1 - C1</b>           | 1.329(4)             | 1.227(9)                 | 1.315(2)                 | 1.360(7)             |
| <b>N1 - C2/O2 - C2</b>   | 1.386(5)             | 1.31(1)                  | 1.355(2)                 | 1.353(7)             |
| <b>C1 - C2</b>           | 1.422(5)             | 1.40(1)                  | 1.439(2)                 | 1.416(8)             |
| <b>C2 - C3</b>           | 1.407(5)             | 1.34(2)                  | 1.423(2)                 | 1.379(9)             |
| <b>C3 - C4</b>           | 1.379(5)             | 1.35(1)                  | 1.370(2)                 | 1.395(8)             |
| <b>C4 - C5</b>           | 1.408(5)             | 1.40(1)                  | 1.433(2)                 | 1.396(9)             |
| <b>C5 - C6</b>           | 1.388(5)             | 1.30(1)                  | 1.383(2)                 | 1.385(9)             |
| <b>C6 - C1</b>           | 1.403(5)             | 1.42(1)                  | 1.430(2)                 | 1.405(9)             |
| <b>Pt - N2 / Pt - P1</b> | 1.962(3)             | 1.859(6)                 | 2.2584(5)                | 1.983(5)             |
| <b>Pt - N4 / Pt - P2</b> | 1.964(3)             | 1.989(7)                 | 2.2675(5)                | 1.966(5)             |
| <b>N2 - N3</b>           | 1.321(4)             | 1.25(1)                  | -                        | 1.307(7)             |
| <b>N3 - C21</b>          | 1.362(5)             | 1.36(1)                  | -                        | 1.390(8)             |

<sup>a</sup>From reference S1. <sup>b</sup>From reference S2.

|                     | <b>1<sup>a</sup></b> |                     | <b>[1]BF<sub>4</sub></b> |                     | <b>[2]PF<sub>6</sub></b> |
|---------------------|----------------------|---------------------|--------------------------|---------------------|--------------------------|
| <b>N1 - Pt - N2</b> | 108.1 (1)            | <b>O1 - Pt - N2</b> | 96.1(3)                  | <b>O1 - Pt - N1</b> | 79.14(5)                 |
| <b>N2 - Pt - N4</b> | 77.6(1)              | <b>O1 - Pt - N1</b> | 82.0(3)                  | <b>N1 - Pt - P2</b> | 97.17(4)                 |
| <b>N4 - Pt - O1</b> | 93.7(2)              | <b>N1 - Pt - N4</b> | 102.6(3)                 | <b>P2 - Pt - P1</b> | 94.79(2)                 |
| <b>N1 - Pt - O1</b> | 80.9(1)              | <b>N4 - Pt - N2</b> | 79.6(3)                  | <b>P1 - Pt - O1</b> | 88.71(3)                 |

<sup>a</sup>From reference S1.

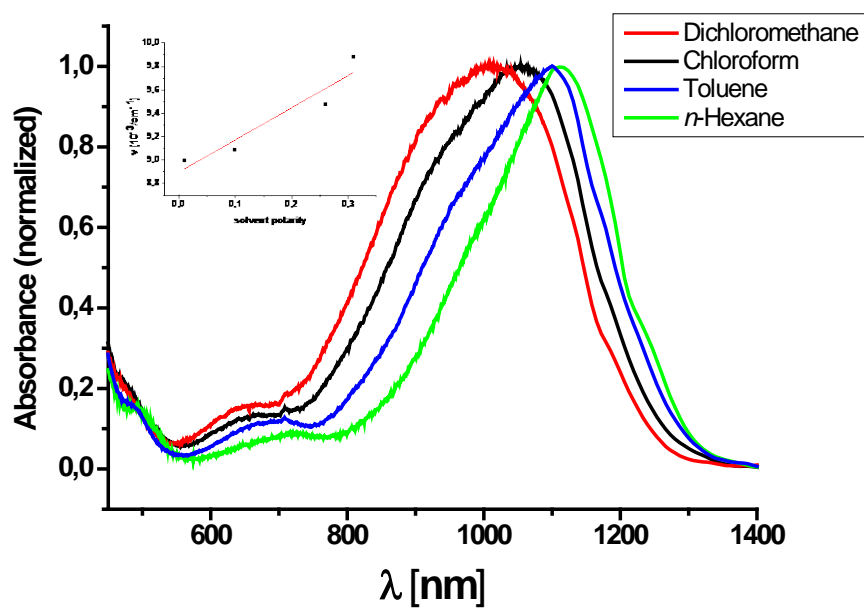

Figure S1. Normalized absorption spectra of 3 in various solvents.

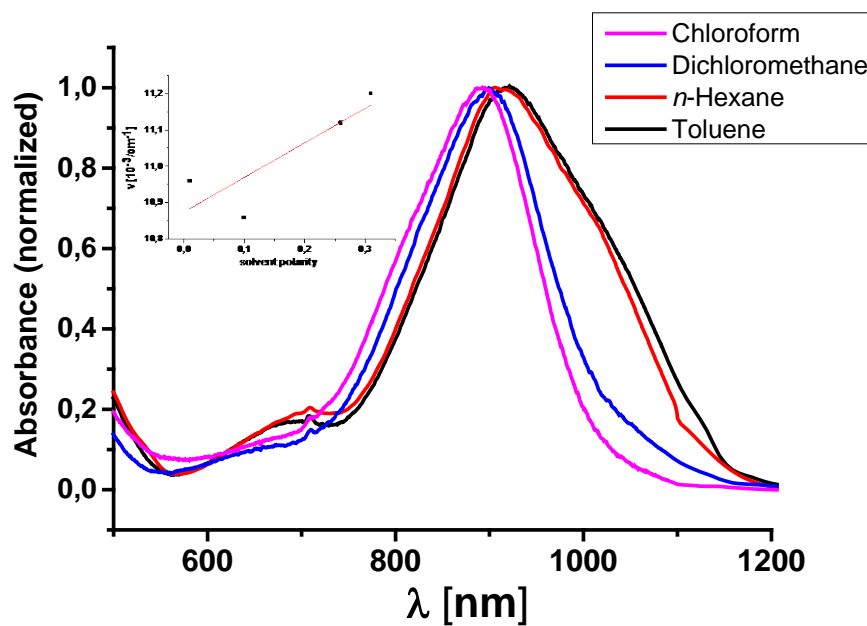

Figure S2. Normalized absorption spectra of 1 in various solvents.

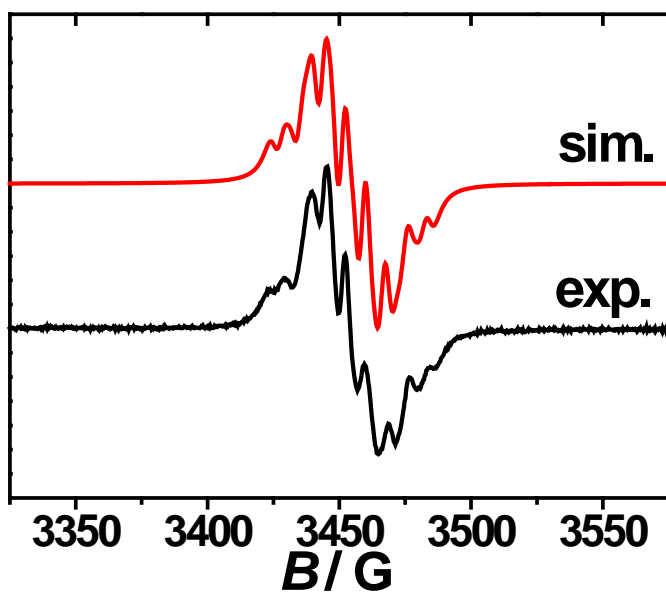

**Figure S3.** EPR spectrum of the reaction product between  $1^{++}$  and  $\text{PPh}_3$  in  $\text{CH}_2\text{Cl}_2$  at 295 K recorded immediately after mixing stoichiometric amounts of the two reactants (bottom) together with simulation (top).  $g = 1.998$ ,  $a(^{195}\text{Pt}) = 32 \text{ G}$ ,  $a(^{14}\text{N}) = 7.6 \text{ G}$ ,  $a(^1\text{H}) = 4.6 \text{ G}$ ,  $a(^{31}\text{P}) = 7 \text{ G}$ .

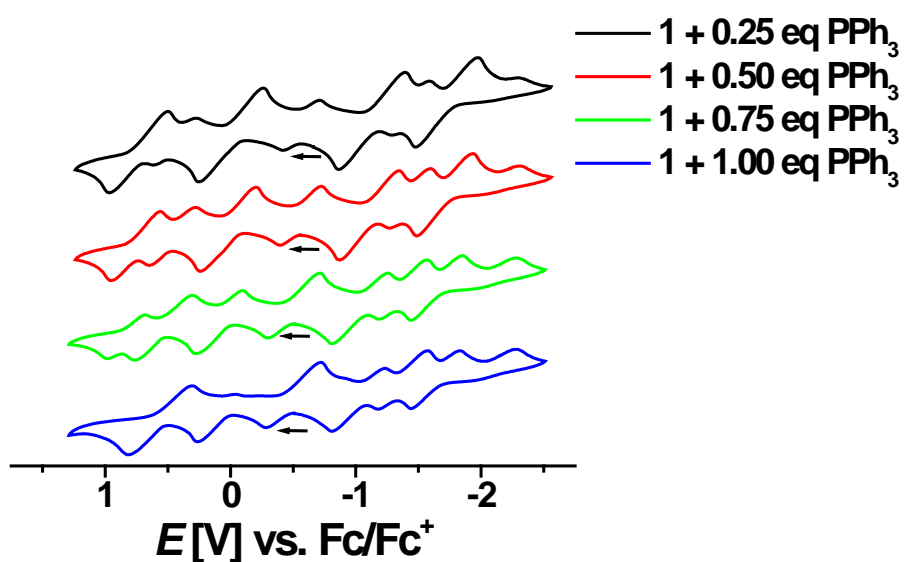

**Figure S4.** Cyclic voltammogram of **1** in  $\text{CH}_2\text{Cl}_2$  / 0.1 M  $\text{Bu}_4\text{NPF}_6$  at  $-40 \text{ }^\circ\text{C}$  in the presence of various amounts of  $\text{CH}_2\text{Cl}_2$ .

**Table S3.** UV-vis-NIR data of the complexes in their various redox forms<sup>a</sup>

|                    | $\lambda$ [nm] ( $\epsilon$ [ $10^3 \text{ M}^{-1} \cdot \text{cm}^{-1}$ ]) |
|--------------------|-----------------------------------------------------------------------------|
| [1] <sup>0</sup>   | 241 (17.6); 326 (12.1); 392 (5.4); 457 (4.6); 679 sh; 897 (20.9)            |
| [1] <sup>+</sup>   | 238 (22.5); 305 (11.9); 338 sh; 415 (10.5); 535 (9.4); 1114 (3.8)           |
| [2] <sup>0</sup>   | 229 (83.8); 340 (12.3); 400 sh                                              |
| [2] <sup>+</sup>   | 229 (85.9); 265 sh; 334 (18.5); 421 (5.8); 469 (6.7); 908 (2.0)             |
| [2] <sup>2+</sup>  | 227 (83.8); 270 sh; 369 sh; 593 (1.8)                                       |
| [3] <sup>0,b</sup> | 319(8.4), 390(9.3), 477 (2.1), 650 (1.7), 970(9.5)                          |

<sup>a</sup> From OTTLE spectroelectrochemistry in  $\text{CH}_2\text{Cl}_2/0.1 \text{ M Bu}_4\text{NPF}_6$ . <sup>b</sup> From ref. 7b.

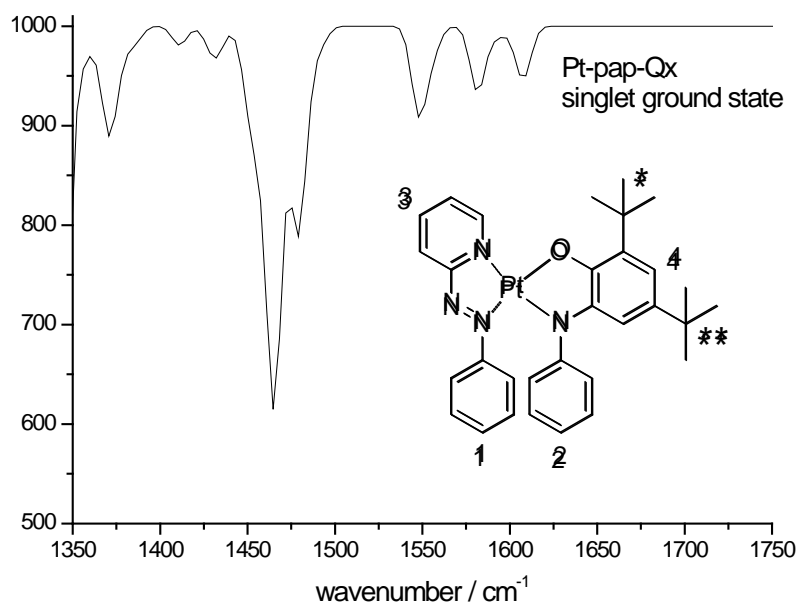**Figure S5.** Simulated IR spectrum of the singlet ground state of **1b** in  $\text{CH}_2\text{Cl}_2$ . The corresponding band assignment is given in Table S4.**Table S4.** Band assignments corresponding to Figure S5 and inset.

| Mode       | Frequency | $T^{*2}$ | assignments                                                 |
|------------|-----------|----------|-------------------------------------------------------------|
| <b>165</b> | 1463      | 140      | All tButyl + phenyl bending modes.<br><b>Mainly * and 3</b> |

|            |      |     |                                                  |
|------------|------|-----|--------------------------------------------------|
| <b>166</b> | 1466 | 225 | Same, all involved equally                       |
| <b>168</b> | 1478 | 180 | <b>Mainly 1 and 3</b>                            |
| <b>171</b> | 1548 | 88  | <b>Mainly 4</b> , strong amplitude, coupled to 3 |
| <b>173</b> | 1582 | 66  | <b>Mainly 4</b> , coupled to 2                   |
| <b>177</b> | 1607 | 24  | <b>Mainly 2 and 3</b> , coupled to 4             |
| <b>178</b> | 1609 | 27  | <b>Mainly 3</b> , coupled to 1 and 2             |

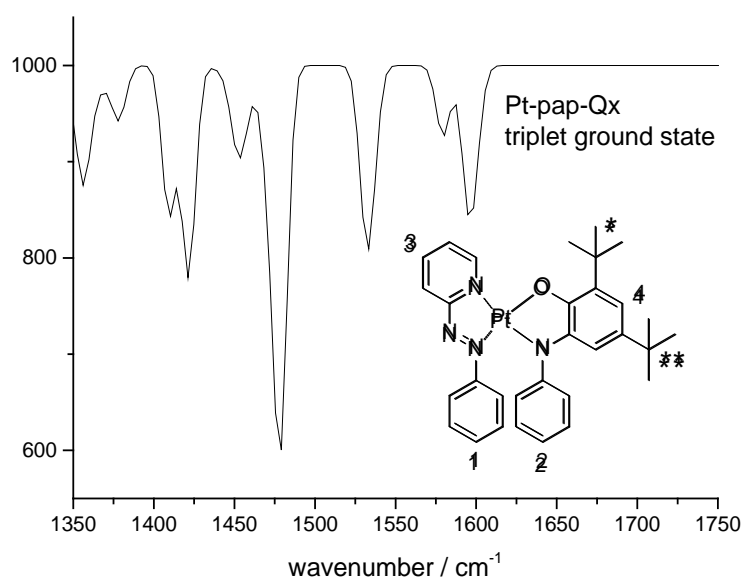

**Figure S6.** Simulated IR spectrum of the triplet ground state of **1b** in CH<sub>2</sub>Cl<sub>2</sub>. The corresponding band assignment is given in Table S5.

**Table S5.** Band assignments corresponding to Figure S6 and inset.

| Mode | Frequency | T <sup>2</sup> | Assignments                               |
|------|-----------|----------------|-------------------------------------------|
| 151  | 1409      | 155            | <b>Mainly 4</b> , affecting O, N and *    |
| 152  | 1422      | 219            | <b>As above</b> , different bending modes |
| 161  | 1452      | 42             | <b>Mostly * and **</b>                    |
| 162  | 1453      | 26             | <b>Mostly ** and 1</b>                    |
| 169  | 1477      | 158            | <b>Mostly 1, 2 and 3</b>                  |
| 170  | 1479      | 246            | <b>As above</b>                           |

|     |      |     |                               |
|-----|------|-----|-------------------------------|
| 171 | 1531 | 126 | <b>Mostly 4</b>               |
| 172 | 1535 | 86  | <b>Mostly 3</b>               |
| 173 | 1579 | 72  | <b>Mostly 4</b>               |
| 176 | 1595 | 115 | <b>Mostly 3, coupled to 2</b> |
| 177 | 1599 | 61  | <b>Mostly 1, coupled to 3</b> |

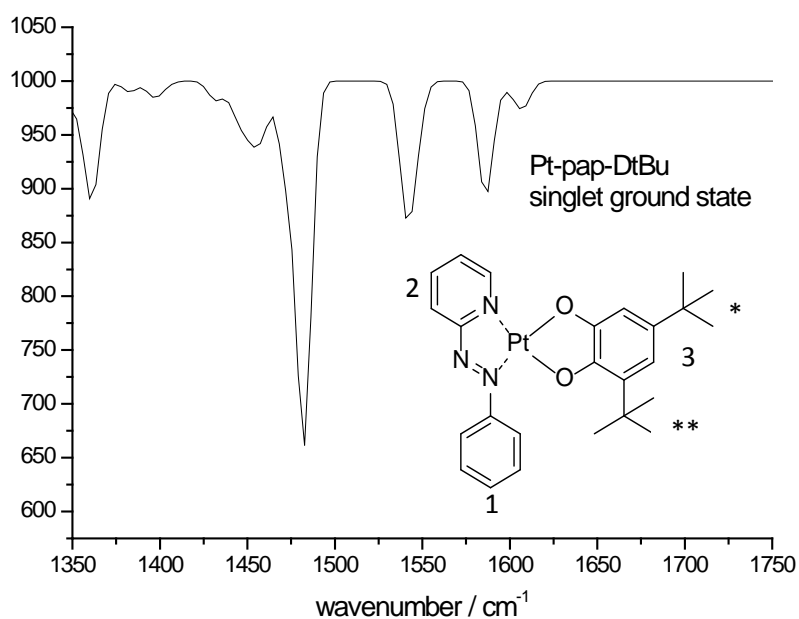

**Figure S7.** Simulated IR spectrum of the singlet ground state of **3** in CH<sub>2</sub>Cl<sub>2</sub>. The corresponding band assignment is given in Table S6.

**Table S6.** Band assignments corresponding to Figure S7 and inset.

| Mode | Frequency | T <sup>2</sup> | Assignments                               |
|------|-----------|----------------|-------------------------------------------|
| 135  | 1451      | 18             | All bending modes, <b>mainly 1 and **</b> |
| 136  | 1453      | 10             | <b>Mainly 3, * and **</b> with some 1     |
| 137  | 1455      | 17             | <b>Mostly *</b>                           |
| 143  | 1482      | 323            | <b>Mainly 1 and 2,</b> some 3 and **      |
| 145  | 1541      | 113            | <b>Mainly 2 and 3</b>                     |
| 146  | 1546      | 38             | <b>Mainly 2 and 3</b>                     |
| 147  | 1586      | 107            | <b>Mainly 3</b>                           |
| 150  | 1608      | 22             | <b>Mainly 2, some 1</b>                   |



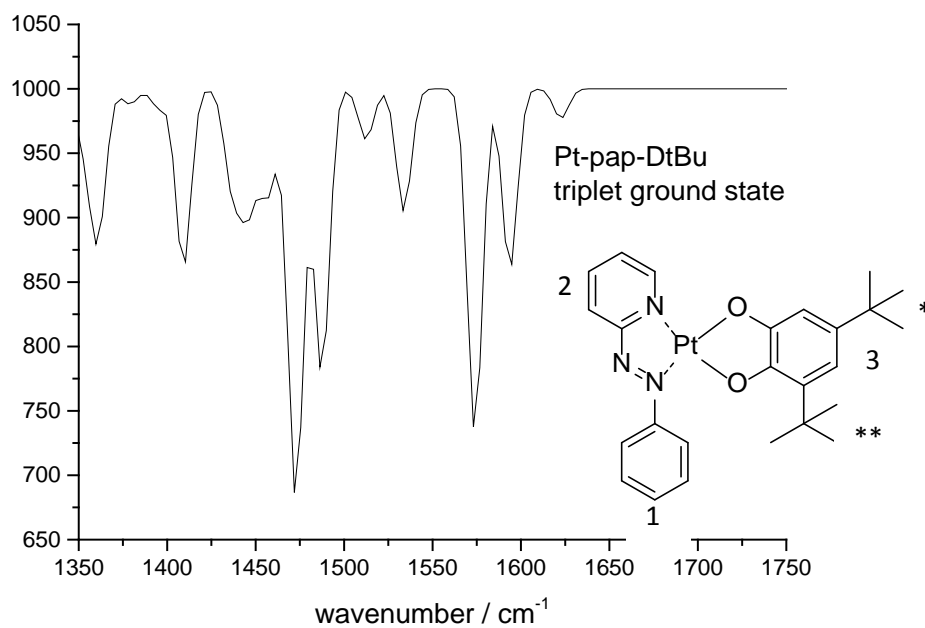

**Figure S8.** Simulated IR spectrum of the triplet ground state of **3** in  $\text{CH}_2\text{Cl}_2$ . The corresponding band assignment is given in Table S7.

**Table S7.** Band assignments corresponding to Figure S8 and inset.

| Mode | Frequency | $T^{*2}$ | Assignments                             |
|------|-----------|----------|-----------------------------------------|
| 127  | 1409      | 139      | <b>Mainly 3</b> , affecting **, * and O |
| 142  | 1473      | 291      | <b>Mainly 2 and 1</b>                   |
| 144  | 1487      | 222      | <b>As above, 1 more than 2</b>          |
| 146  | 1534      | 95       | <b>Mainly 2</b>                         |
| 147  | 1574      | 267      | <b>Mostly 3</b>                         |
| 149  | 1594      | 141      | <b>Mostly 2</b>                         |

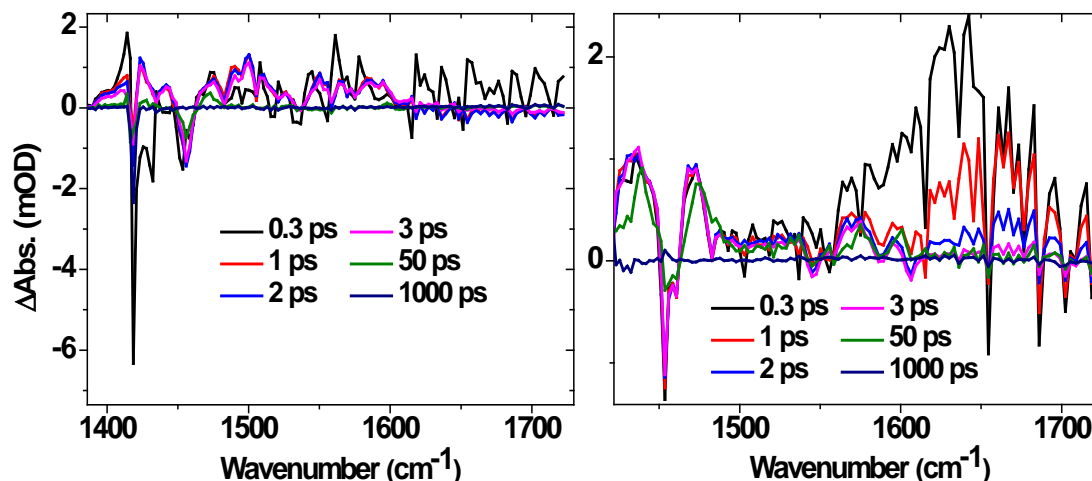

**Figure S9.** Early-time TRIR spectra following 400 nm excitation for **1b** (left) and **3** (right). The 0.3 – 2 ps traces show large signals in the 1600  $\text{cm}^{-1}$  region associated with vibrationally excited water molecules that are hydrogen-bonded to the compounds. It should be noted that compounds **1b** and **3** are expected to have strong affinity to water, through H-bonding to one ( $^{\text{O,N}}\text{Q}$ ) or two ( $^{\text{O,O}}\text{Q}$ ) oxygen atoms. This leads to water molecules being associated in a “supermolecule” if even traces of moisture are present. This susceptibility to water can give rise to early-time effects in the TRIR spectra as some of the excitation energy is rapidly distributed to H-bonded water molecules which give strong signals in the fingerprint IR region investigated, and which decay with lifetimes of 0.5 – 1 ps as vibrationally excited water molecules cool down. Such an interpretation is further supported by the fact that these early-time effects have not been observed in our experiments using the same set-up and related Pt(II) compounds but without O-donor atoms – such as Pt(II) diimine acetylides<sup>S3</sup> – and is more pronounced for **3** than for **1b**.

### References:

- (S1) Deibel, N.; Schweinfurth, D.; Hohloch, S.; Fiedler, J.; Sarkar, B., *Chem. Commun.*, **2012**, 48, 2388.
- (S2) Sarkar, B.; Huebner, R.; Pattacini, R.; Hartenbach, I., *Dalton Trans.*, **2009**, 4653.
- (S3) Adams, C. J.; Fey, N.; Harrison, Z. A.; Sazanovich, I. V; Towrie, M.; Weinstein, J. A. *Inorg. Chem.* **2008**, 47, 8242.

Optimized structure (BP86) of **1** in the singlet state:

|   |           |          |          |
|---|-----------|----------|----------|
| C | 3.452208  | 4.910924 | 6.480684 |
| C | 2.042023  | 5.144147 | 6.460672 |
| C | 1.308189  | 5.151585 | 5.229976 |
| C | 3.384620  | 4.815974 | 3.985036 |
| C | 4.240259  | 4.870359 | 7.807830 |
| C | 5.735564  | 4.547174 | 7.588849 |
| H | 6.252374  | 4.513689 | 8.568080 |
| H | 6.245073  | 5.315466 | 6.974945 |
| H | 5.882346  | 3.562143 | 7.103914 |
| C | 3.654563  | 3.771656 | 8.735264 |
| H | 4.206835  | 3.747298 | 9.696586 |
| H | 3.746487  | 2.772366 | 8.266022 |
| H | 2.586322  | 3.947730 | 8.953495 |
| C | 4.155681  | 6.255461 | 8.504875 |
| H | 4.703541  | 6.234624 | 9.468958 |
| H | 3.109240  | 6.546407 | 8.705155 |
| H | 4.611546  | 7.041794 | 7.871638 |
| C | 4.186789  | 4.661854 | 2.673934 |
| C | 3.293184  | 4.782608 | 1.420288 |
| H | 3.909748  | 4.671092 | 0.506750 |
| H | 2.791035  | 5.767856 | 1.363234 |
| H | 2.512890  | 3.997327 | 1.390433 |
| C | 5.272670  | 5.768283 | 2.598787 |
| H | 5.864251  | 5.669936 | 1.666072 |
| H | 5.978775  | 5.714564 | 3.449264 |
| H | 4.812719  | 6.775683 | 2.608521 |
| C | 4.869949  | 3.268397 | 2.647051 |
| H | 5.457931  | 3.141242 | 1.715519 |
| H | 4.117001  | 2.457288 | 2.690587 |
| H | 5.561144  | 3.129027 | 3.500114 |
| C | -0.869605 | 5.621093 | 4.251013 |
| C | -1.551092 | 6.853080 | 4.144483 |

|   |           |          |           |
|---|-----------|----------|-----------|
| H | -1.429979 | 7.593120 | 4.946247  |
| C | -2.360404 | 7.121248 | 3.028717  |
| H | -2.885506 | 8.083740 | 2.960408  |
| C | -2.494012 | 6.169956 | 2.001887  |
| H | -3.126443 | 6.382040 | 1.129418  |
| C | -1.818026 | 4.940295 | 2.104554  |
| H | -1.927743 | 4.184012 | 1.315023  |
| C | -1.014293 | 4.662747 | 3.221464  |
| H | -0.511006 | 3.691853 | 3.317466  |
| C | -2.336158 | 6.352450 | 9.442480  |
| C | -2.746543 | 6.847078 | 10.710874 |
| H | -3.809440 | 7.070488 | 10.857434 |
| C | -1.800373 | 7.022411 | 11.712896 |
| H | -2.099754 | 7.401164 | 12.698473 |
| C | -0.440448 | 6.700597 | 11.449836 |
| H | 0.331416  | 6.818129 | 12.219281 |
| C | -0.081457 | 6.229729 | 10.191720 |
| H | 0.948881  | 5.973634 | 9.919368  |
| C | -3.539068 | 5.134796 | 6.385879  |
| C | -3.211495 | 3.971814 | 5.659713  |
| H | -2.241299 | 3.490706 | 5.835795  |
| C | -4.141780 | 3.426787 | 4.761743  |
| H | -3.885827 | 2.513395 | 4.208561  |
| C | -5.396305 | 4.035201 | 4.578950  |
| H | -6.121259 | 3.604786 | 3.875071  |
| C | -5.719633 | 5.197004 | 5.306191  |
| H | -6.696289 | 5.680236 | 5.166650  |
| C | -4.802215 | 5.745050 | 6.212580  |
| H | -5.043680 | 6.642250 | 6.793738  |
| C | 2.001848  | 5.027142 | 3.996987  |
| H | 1.441020  | 5.108048 | 3.062098  |
| C | 4.071036  | 4.742900 | 5.233064  |
| H | 5.150996  | 4.560721 | 5.213073  |
| N | -0.056970 | 5.364766 | 5.394174  |

|    |           |          |          |
|----|-----------|----------|----------|
| N  | -0.998748 | 6.059147 | 9.200329 |
| N  | -3.214157 | 6.093039 | 8.451128 |
| N  | -2.614989 | 5.638717 | 7.350629 |
| O  | 1.334757  | 5.413806 | 7.564514 |
| Pt | -0.631739 | 5.580721 | 7.300658 |

Optimized structure (BP86) of **1** in the triplet state:

|   |          |          |          |
|---|----------|----------|----------|
| C | 3.471343 | 4.881297 | 6.491196 |
| C | 2.053267 | 5.105009 | 6.488043 |
| C | 1.319577 | 5.143181 | 5.239858 |
| C | 3.405204 | 4.893989 | 3.985280 |
| C | 4.260264 | 4.787217 | 7.814744 |
| C | 5.758829 | 4.492555 | 7.578941 |
| H | 6.276518 | 4.418565 | 8.555244 |
| H | 6.259727 | 5.295670 | 7.003443 |
| H | 5.918172 | 3.533116 | 7.048525 |
| C | 3.687340 | 3.637241 | 8.686871 |
| H | 4.240746 | 3.573309 | 9.645386 |
| H | 3.791493 | 2.662817 | 8.170223 |
| H | 2.617675 | 3.790306 | 8.914432 |
| C | 4.159983 | 6.135943 | 8.578000 |
| H | 4.708002 | 6.072379 | 9.539809 |
| H | 3.111144 | 6.405788 | 8.793259 |
| H | 4.608915 | 6.957218 | 7.985396 |
| C | 4.220069 | 4.820354 | 2.677213 |
| C | 3.333082 | 4.985854 | 1.424269 |
| H | 3.957726 | 4.928258 | 0.511463 |
| H | 2.815450 | 5.964600 | 1.409678 |
| H | 2.566284 | 4.190378 | 1.350444 |
| C | 5.284804 | 5.949994 | 2.667648 |
| H | 5.884967 | 5.907836 | 1.736522 |
| H | 5.986466 | 5.868707 | 3.519644 |
| H | 4.805695 | 6.946924 | 2.721406 |

|   |           |          |           |
|---|-----------|----------|-----------|
| C | 4.929947  | 3.442546 | 2.589743  |
| H | 5.529063  | 3.374541 | 1.659411  |
| H | 4.193034  | 2.615837 | 2.583283  |
| H | 5.616813  | 3.272558 | 3.440813  |
| C | -0.864031 | 5.411041 | 4.233414  |
| C | -1.671466 | 6.556354 | 4.058746  |
| H | -1.639358 | 7.347310 | 4.818825  |
| C | -2.491175 | 6.673822 | 2.926324  |
| H | -3.111443 | 7.570990 | 2.799285  |
| C | -2.526994 | 5.648567 | 1.963598  |
| H | -3.176650 | 5.740417 | 1.083077  |
| C | -1.735163 | 4.499352 | 2.141794  |
| H | -1.769583 | 3.686063 | 1.403904  |
| C | -0.907585 | 4.376828 | 3.268593  |
| H | -0.307754 | 3.470802 | 3.424690  |
| C | -2.303664 | 6.492820 | 9.423163  |
| C | -2.670111 | 7.047913 | 10.682950 |
| H | -3.700250 | 7.399531 | 10.809927 |
| C | -1.728886 | 7.117083 | 11.704519 |
| H | -2.006770 | 7.540018 | 12.678934 |
| C | -0.411605 | 6.634402 | 11.484503 |
| H | 0.352940  | 6.669577 | 12.268525 |
| C | -0.091645 | 6.112925 | 10.230384 |
| H | 0.907605  | 5.737902 | 9.979595  |
| C | -3.600136 | 5.305363 | 6.394572  |
| C | -3.330863 | 4.143542 | 5.633769  |
| H | -2.382919 | 3.615169 | 5.793421  |
| C | -4.286138 | 3.654906 | 4.731979  |
| H | -4.068449 | 2.744280 | 4.158005  |
| C | -5.519369 | 4.313961 | 4.570831  |
| H | -6.264844 | 3.929282 | 3.861967  |
| C | -5.792237 | 5.466738 | 5.334296  |
| H | -6.753187 | 5.987230 | 5.218690  |
| C | -4.849944 | 5.959941 | 6.245414  |

|    |           |          |          |
|----|-----------|----------|----------|
| H  | -5.056986 | 6.848356 | 6.852378 |
| C  | 2.024934  | 5.079991 | 4.001521 |
| H  | 1.463079  | 5.196041 | 3.070843 |
| C  | 4.088585  | 4.774851 | 5.239928 |
| H  | 5.171299  | 4.610267 | 5.213260 |
| N  | -0.038753 | 5.307627 | 5.385918 |
| N  | -0.998975 | 6.044898 | 9.228294 |
| N  | -3.189424 | 6.332579 | 8.423469 |
| N  | -2.651189 | 5.753912 | 7.336092 |
| O  | 1.361234  | 5.302520 | 7.596797 |
| Pt | -0.636548 | 5.544695 | 7.320722 |

Optimized structure (BP86) of  $\mathbf{1}^+$  in the doublet state:

|   |          |          |          |
|---|----------|----------|----------|
| C | 3.461915 | 4.908837 | 6.493926 |
| C | 2.047059 | 5.141493 | 6.476059 |
| C | 1.303920 | 5.161405 | 5.226814 |
| C | 3.374568 | 4.878978 | 3.975295 |
| C | 4.257044 | 4.832785 | 7.813854 |
| C | 5.749267 | 4.515968 | 7.567488 |
| H | 6.275218 | 4.453601 | 8.539012 |
| H | 6.255816 | 5.302931 | 6.975578 |
| H | 5.893271 | 3.544123 | 7.056318 |
| C | 3.677154 | 3.705558 | 8.711186 |
| H | 4.247447 | 3.647975 | 9.658785 |
| H | 3.757140 | 2.720422 | 8.211947 |
| H | 2.614798 | 3.875352 | 8.962084 |
| C | 4.177780 | 6.200115 | 8.546726 |
| H | 4.742165 | 6.150804 | 9.498502 |
| H | 3.136877 | 6.488013 | 8.779108 |
| H | 4.624273 | 7.006053 | 7.932648 |
| C | 4.194307 | 4.777922 | 2.677290 |
| C | 3.314942 | 4.924901 | 1.417362 |
| H | 3.945602 | 4.848776 | 0.511466 |

|   |           |          |           |
|---|-----------|----------|-----------|
| H | 2.804076  | 5.906604 | 1.378164  |
| H | 2.548300  | 4.128661 | 1.348791  |
| C | 5.263940  | 5.905021 | 2.662450  |
| H | 5.865802  | 5.841699 | 1.735127  |
| H | 5.965859  | 5.833461 | 3.514935  |
| H | 4.791752  | 6.905830 | 2.694235  |
| C | 4.897926  | 3.393422 | 2.627176  |
| H | 5.497902  | 3.308825 | 1.700272  |
| H | 4.160141  | 2.567913 | 2.631319  |
| H | 5.586614  | 3.236974 | 3.479159  |
| C | -0.880759 | 5.459898 | 4.237707  |
| C | -1.634500 | 6.638816 | 4.053700  |
| H | -1.558100 | 7.446649 | 4.793073  |
| C | -2.443618 | 6.777576 | 2.915606  |
| H | -3.014393 | 7.703395 | 2.767069  |
| C | -2.517948 | 5.741577 | 1.965996  |
| H | -3.153337 | 5.853962 | 1.078026  |
| C | -1.777160 | 4.560548 | 2.158177  |
| H | -1.840005 | 3.744835 | 1.425846  |
| C | -0.958372 | 4.415013 | 3.288370  |
| H | -0.393226 | 3.488454 | 3.453220  |
| C | -2.297398 | 6.376611 | 9.466247  |
| C | -2.711956 | 6.872871 | 10.720168 |
| H | -3.767433 | 7.131726 | 10.859873 |
| C | -1.762716 | 7.008943 | 11.737875 |
| H | -2.058451 | 7.391290 | 12.722574 |
| C | -0.423181 | 6.641644 | 11.485564 |
| H | 0.345644  | 6.724494 | 12.262288 |
| C | -0.066817 | 6.161496 | 10.220845 |
| H | 0.956387  | 5.867693 | 9.960968  |
| C | -3.566378 | 5.268711 | 6.376761  |
| C | -3.303935 | 4.085901 | 5.654731  |
| H | -2.377806 | 3.529937 | 5.845513  |
| C | -4.265376 | 3.604662 | 4.755099  |



|    |           |          |          |
|----|-----------|----------|----------|
| H  | -4.079160 | 2.669473 | 4.212283 |
| C  | -5.467543 | 4.309365 | 4.558647 |
| H  | -6.214084 | 3.931767 | 3.847899 |
| C  | -5.717733 | 5.496188 | 5.276986 |
| H  | -6.654039 | 6.047419 | 5.121230 |
| C  | -4.777961 | 5.975051 | 6.197092 |
| H  | -4.960736 | 6.889368 | 6.773192 |
| C  | 1.999257  | 5.072775 | 3.982969 |
| H  | 1.438797  | 5.172191 | 3.050143 |
| C  | 4.062182  | 4.776019 | 5.240596 |
| H  | 5.142802  | 4.603035 | 5.208985 |
| N  | -0.043065 | 5.339957 | 5.387904 |
| N  | -0.983039 | 6.033824 | 9.232156 |
| N  | -3.190237 | 6.143898 | 8.454557 |
| N  | -2.628318 | 5.688443 | 7.368492 |
| O  | 1.346337  | 5.380770 | 7.570227 |
| Pt | -0.628323 | 5.563182 | 7.315369 |

Optimized structure (BP86) of  $\mathbf{1}^{\cdot-}$  in the doublet state:

|   |          |          |          |
|---|----------|----------|----------|
| C | 3.453062 | 4.885893 | 6.470308 |
| C | 2.048264 | 5.133356 | 6.444427 |
| C | 1.325657 | 5.139776 | 5.206834 |
| C | 3.434369 | 4.787006 | 3.987244 |
| C | 4.222230 | 4.848126 | 7.810584 |
| C | 5.719770 | 4.513293 | 7.624338 |
| H | 6.218115 | 4.482820 | 8.614823 |
| H | 6.244690 | 5.273256 | 7.012131 |
| H | 5.867539 | 3.524820 | 7.145570 |
| C | 3.614517 | 3.761237 | 8.737359 |
| H | 4.135833 | 3.749213 | 9.717993 |
| H | 3.721081 | 2.756977 | 8.280492 |
| H | 2.539346 | 3.944335 | 8.911533 |
| C | 4.135502 | 6.236515 | 8.500124 |

|   |           |          |           |
|---|-----------|----------|-----------|
| H | 4.653162  | 6.218366 | 9.482777  |
| H | 3.083699  | 6.533129 | 8.660014  |
| H | 4.617674  | 7.012646 | 7.872614  |
| C | 4.240762  | 4.627837 | 2.676573  |
| C | 3.355224  | 4.754820 | 1.417364  |
| H | 3.974464  | 4.637543 | 0.504430  |
| H | 2.858319  | 5.742681 | 1.361817  |
| H | 2.566168  | 3.978418 | 1.389326  |
| C | 5.336695  | 5.723980 | 2.599215  |
| H | 5.937097  | 5.622062 | 1.670093  |
| H | 6.031060  | 5.667474 | 3.459321  |
| H | 4.880908  | 6.733552 | 2.607023  |
| C | 4.916589  | 3.231087 | 2.643922  |
| H | 5.511625  | 3.098357 | 1.715209  |
| H | 4.155287  | 2.427283 | 2.683997  |
| H | 5.596521  | 3.086245 | 3.505286  |
| C | -0.848763 | 5.648727 | 4.216038  |
| C | -1.650329 | 6.817986 | 4.190093  |
| H | -1.614499 | 7.485482 | 5.060958  |
| C | -2.469631 | 7.108227 | 3.089474  |
| H | -3.084532 | 8.019760 | 3.101705  |
| C | -2.508010 | 6.247373 | 1.976448  |
| H | -3.151193 | 6.476172 | 1.115020  |
| C | -1.724986 | 5.078370 | 1.992304  |
| H | -1.762909 | 4.379268 | 1.143565  |
| C | -0.912135 | 4.776872 | 3.096506  |
| H | -0.345525 | 3.837111 | 3.121302  |
| C | -2.340312 | 6.454693 | 9.398974  |
| C | -2.713113 | 6.996784 | 10.672177 |
| H | -3.762377 | 7.282718 | 10.814846 |
| C | -1.764255 | 7.135004 | 11.673597 |
| H | -2.051126 | 7.546634 | 12.651805 |
| C | -0.416500 | 6.736590 | 11.428843 |
| H | 0.360577  | 6.828863 | 12.197064 |

|    |           |          |           |
|----|-----------|----------|-----------|
| C  | -0.089489 | 6.228573 | 10.173797 |
| H  | 0.927507  | 5.918229 | 9.903576  |
| C  | -3.581501 | 5.140674 | 6.420771  |
| C  | -3.201951 | 4.078819 | 5.560922  |
| H  | -2.171394 | 3.707878 | 5.615186  |
| C  | -4.134051 | 3.495834 | 4.692570  |
| H  | -3.811958 | 2.673092 | 4.038388  |
| C  | -5.469850 | 3.942891 | 4.659790  |
| H  | -6.197586 | 3.481815 | 3.977027  |
| C  | -5.856606 | 4.988149 | 5.522318  |
| H  | -6.895593 | 5.351138 | 5.513537  |
| C  | -4.935314 | 5.578883 | 6.396808  |
| H  | -5.234050 | 6.384517 | 7.076235  |
| C  | 2.044772  | 5.010953 | 3.992426  |
| H  | 1.501375  | 5.107984 | 3.048548  |
| C  | 4.104478  | 4.706562 | 5.231529  |
| H  | 5.183441  | 4.510750 | 5.231911  |
| N  | -0.051008 | 5.370772 | 5.345779  |
| N  | -1.003401 | 6.089264 | 9.180632  |
| N  | -3.222116 | 6.242716 | 8.422989  |
| N  | -2.647210 | 5.691678 | 7.312702  |
| O  | 1.348798  | 5.412517 | 7.558721  |
| Pt | -0.635727 | 5.601426 | 7.277478  |
